# Supplementary material for: Fabrication of cefotaxime sodium-functionalized gold nanoclusters for the detection of copper ions in Chinese herbal medicines
Source: Royal Society of Chemistry journal article supplement (doi:10.1039/c8ra09987a), 2019-01-01
Supplement: c8ra09987a1.pdf [file c8ra09987a1.pdf]

## Electronic Supplementary Information

### **Fabrication of cefotaxime sodium functionalized gold nanoclusters for detection of copper ions in Chinese herbal medicine**

Cunling Ye<sup>a,\*</sup>, Yuanfei Wang<sup>a</sup>, Shen Wang<sup>a</sup> and Zhike Wang<sup>b,\*</sup>

<sup>a</sup> School of Chemistry and Chemical Engineering, Henan Normal University, Xinxiang, Henan 453007, China

<sup>b</sup> School of Environment, Henan Key Laboratory for Environmental Pollution Control, Key Laboratory for Yellow River and Huai River Water Environment and Pollution Control, Ministry of Education, Henan Normal University, Xinxiang, Henan 453007, China

\*Corresponding Author

Cunling Ye

Tel: 86-373-3326335

E-mail: ycl@htu.cn

Zhike Wang

Tel: 86-373-3325971

E-mail: wzk@htu.cn

**Table S1** Analytical results of Cu<sup>2+</sup> in CHMs by the proposed method and by FAAS method <sup>a</sup>.

| Samples  | Cu <sup>2+</sup> found by<br>the proposed method (µg g <sup>-1</sup> ) | RSD<br>(%) | Cu <sup>2+</sup> found by<br>FAAS method (µg g <sup>-1</sup> ) | Relative error<br>(%) |
|----------|------------------------------------------------------------------------|------------|----------------------------------------------------------------|-----------------------|
| Licorice | 11.89                                                                  | 1.8        | 10.95                                                          | 8.6                   |
| Alisma   | 22.32                                                                  | 2.0        | 23.90                                                          | -6.6                  |
| Salvia   | 29.05                                                                  | 1.9        | 30.25                                                          | -4.0                  |
| Poria    | 19.03                                                                  | 2.7        | 20.55                                                          | -7.4                  |

<sup>a</sup>Average of five determinations.

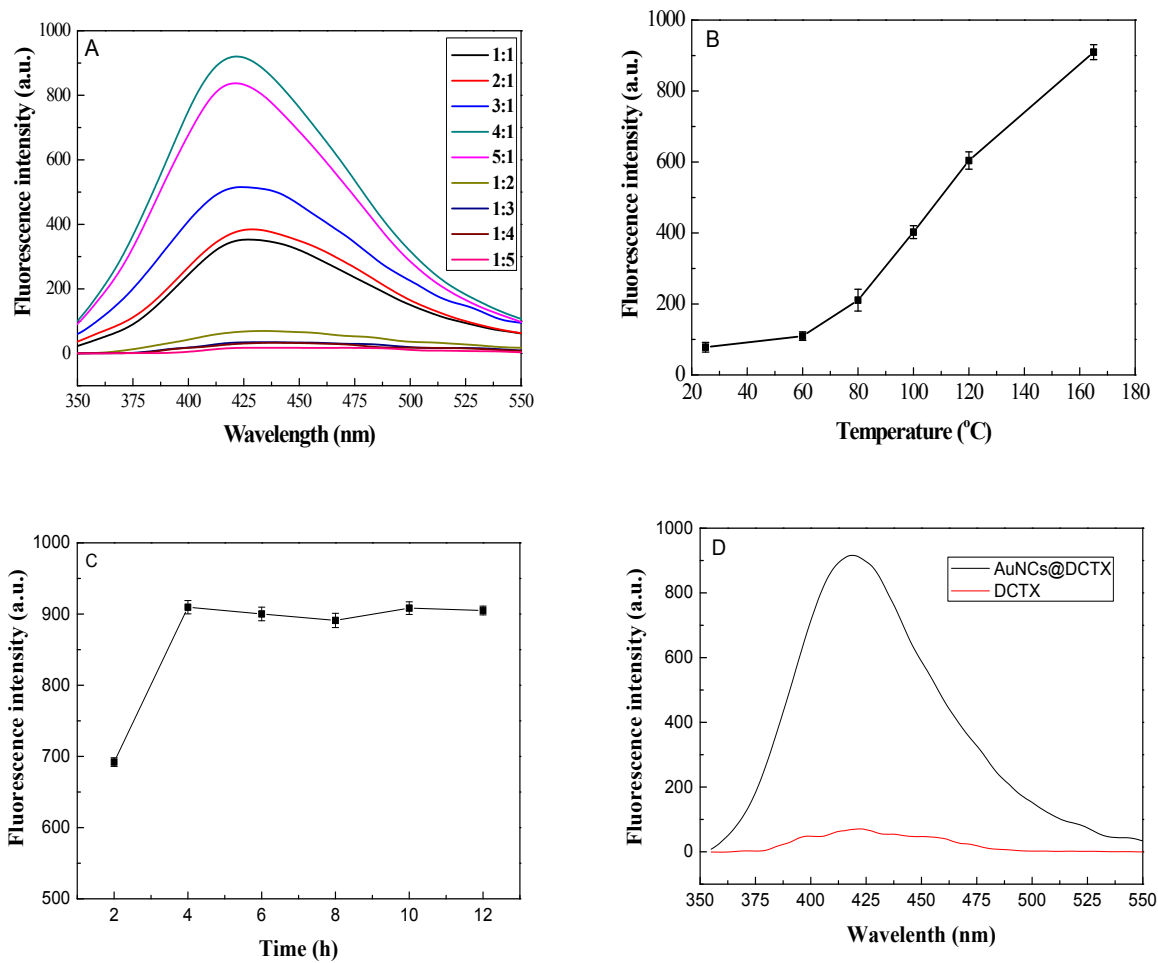

**Fig. S1.** Effects of the molar ratio of  $\text{HAuCl}_4$  to DCTX (A), reaction time (B) and reaction time (C) on the fluorescence intensity of the AuNCs@DCTX, respectively; The emission spectra of the prepared AuNCs@DCTX and DCTX (D).

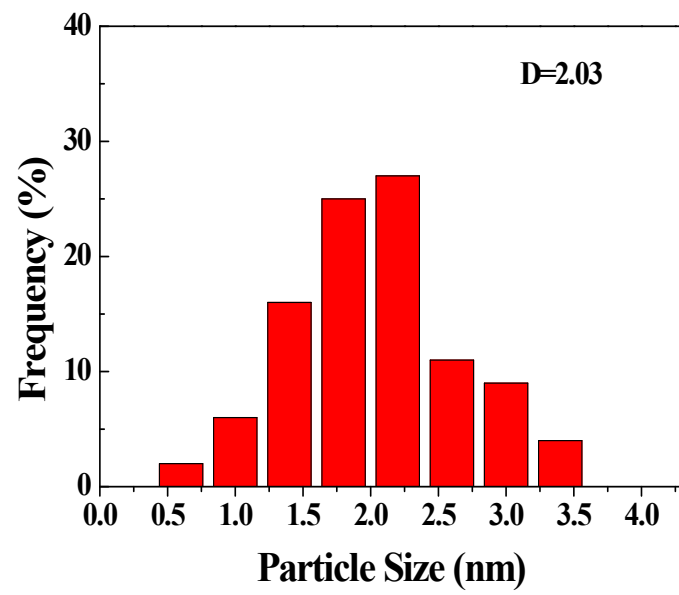

**Fig. S2.** Histogram of size distribution of AuNCs@DCTX.

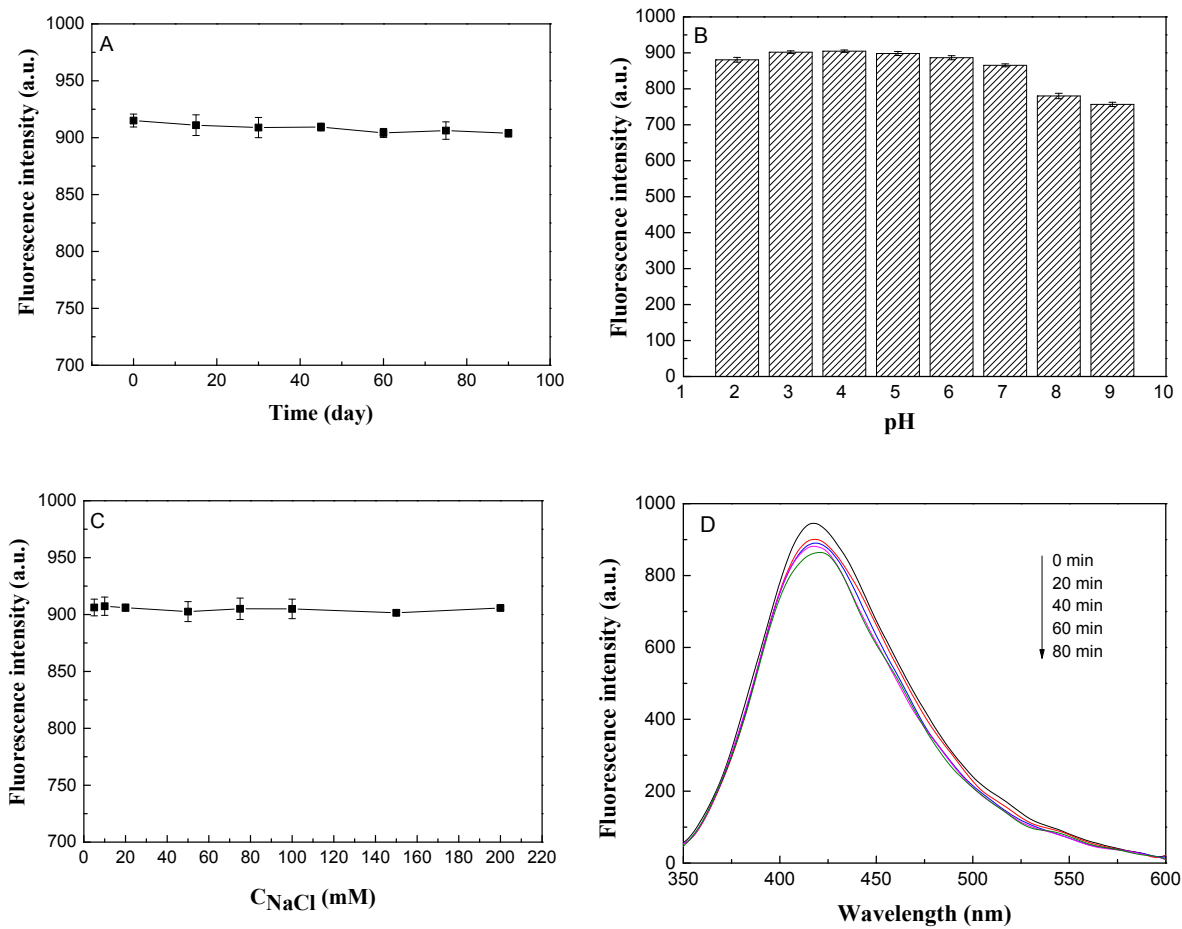

**Fig. S3.** Effects of storage time (A), solution pH (B), ionic strength (C) and light exposure time on the fluorescence intensity of AuNCs@DCTX.

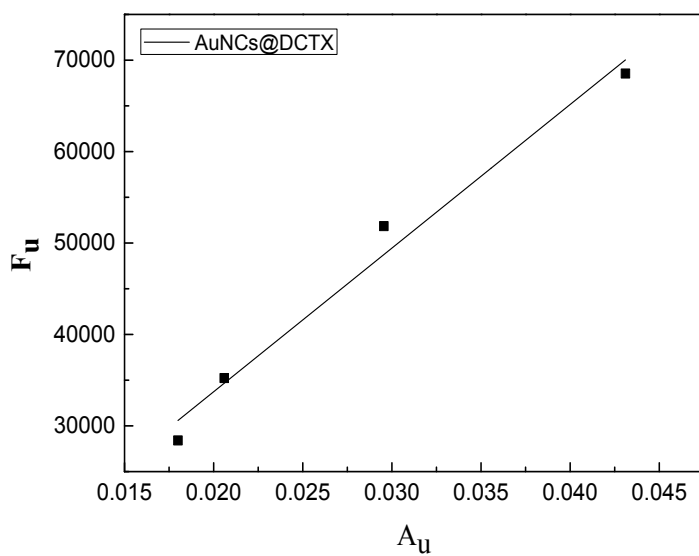

**Fig. S4.** Relationship between the integrated fluorescence intensities of the AuNCs@DCTX under 321 nm excitation and its corresponding absorbance.

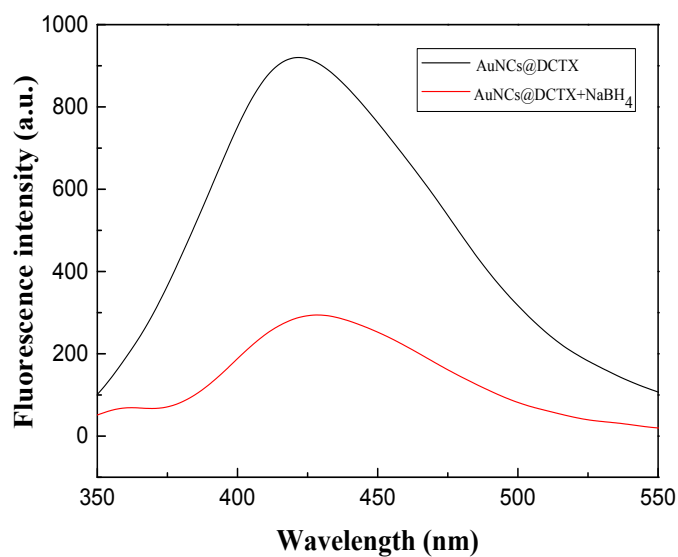

**Fig. S5.** The fluorescence spectra of the AuNCs@DCTX before and after adding 1 mM NaBH<sub>4</sub>.

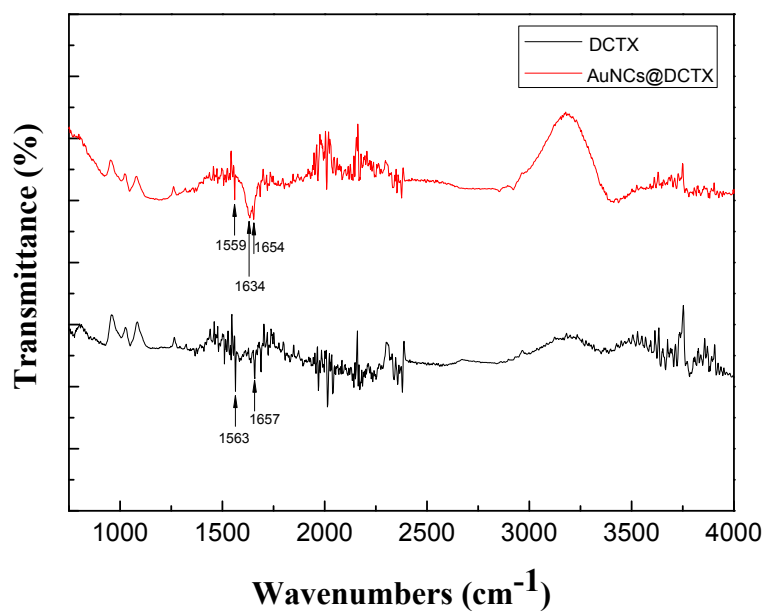

**Fig. S6.** Infrared spectra of DCTX and AuNCs@DCTX.

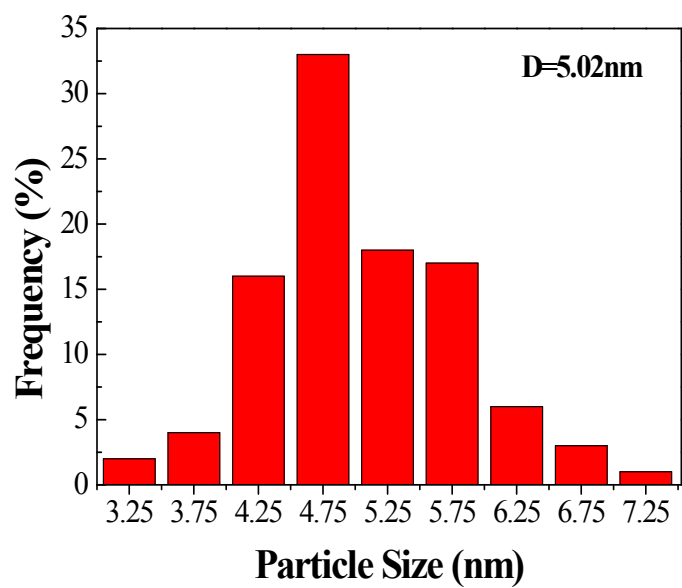

**Fig. S7.** Histogram of size distribution for AuNCs@DCTX after adding  $\text{Cu}^{2+}$ .
